# Supplementary material for: Graphitic nitrogen in carbon catalysts is important for the reduction of nitrite as revealed by naturally abundant 15 N NMR spectroscopy
Source: Royal Society of Chemistry journal article supplement (doi:10.1039/d1dt00658d), 2021-01-01
Supplement: d1dt00658d1.pdf [file d1dt00658d1.pdf]

## Electronic Supplementary Information (ESI) for

### Graphitic nitrogen in carbon catalysts important for the reduction of nitrite revealed by $^{15}\text{N}$ NMR spectroscopy at natural abundance

Zheng Chen,<sup>ab</sup> Aleksander Jaworski,<sup>b</sup> Jianhong Chen,<sup>b</sup> Tetyana M. Budnyak,<sup>b</sup> Ireneusz Szewczyk,<sup>c</sup> Anna Rokicińska,<sup>c</sup> Richard Dronskowski,<sup>ad</sup> Niklas Hedin,<sup>b</sup> Piotr Kuśtrowski\*<sup>c</sup> and Adam Slabon\*<sup>b</sup>

<sup>a</sup>Institute of Inorganic Chemistry, RWTH Aachen University, 52056 Aachen, Germany

<sup>b</sup>Department of Materials and Environmental Chemistry, Stockholm University, 10691 Stockholm, Sweden

<sup>c</sup>Faculty of Chemistry, Jagiellonian University, 30-387 Krakow, Poland

<sup>d</sup>Hoffmann Institute of Advanced Materials, Shenzhen Polytechnic, 7098 Liuxian Blvd, Shenzhen, China

Corresponding Authors

Adam Slabon: [adam.slabon@mmk.su.se](mailto:adam.slabon@mmk.su.se)

Piotr Kuśtrowski: [piotr.kustrowski@uj.edu.pl](mailto:piotr.kustrowski@uj.edu.pl)

#### Supplement:

**Fig. S1** The calibration curves used to calibrate the concentrations of  $\text{NO}_2^-$  and  $\text{NH}_4^+$  ion by spectrophotometer at 520 nm and 655 nm absorbance spectra, respectively.

**Fig. S2** CV curves of N-doped C ( $\text{N}_2$ ) and N-doped C ( $\text{NH}_3$ ) on HER (a, c) and OER (b, d) in 0.05 M  $\text{H}_2\text{SO}_4$  (pH 1) electrolyte and 0.1 M NaOH (pH 13) electrolyte. A carbon paper (c, d) instead of a Pt wire as a counter electrode in order to ensure that there is no migration of Pt ions to the working electrode during the electrocatalytic experiments, HER and OER results show that the electrocatalytic activities of N-doped C ( $\text{NH}_3$ ) and N-doped C ( $\text{N}_2$ ) C are similar and without majorly change.

**Fig. S3** The selectivity, Faradaic efficiency and  $\text{NH}_4^+$  yield of N-doped C ( $\text{NH}_3$ ) toward nitrite reduction to ammonia.

**Fig. S4** T1 NMR relaxation curve for  $^{13}\text{C}$  in N-doped C ( $\text{NH}_3$ ). The same dataset fitted with biexponential function [ $A1*(1-\exp(-x/T1)) + A2*(1-\exp(-x/T2))$ ] provided A1 and A2 of 0.55 and 0.45, and T1 and T2 of 0.21 and 7.01 s, respectively (simple exponential function does not fit).

**Fig. S5** XRD of N-doped C ( $\text{N}_2$ ) and N-doped C ( $\text{NH}_3$ ).

**Fig. S6** SEM micrographs of N-doped C ( $\text{NH}_3$ ) (a) and N-doped C ( $\text{N}_2$ ) (b).

**Fig. S7** TEM images of N-doped C ( $\text{NH}_3$ ) before (a, b) and after (c, d) the electrocatalytic tests; (e) XPS N 1s spectra of the N-doped C ( $\text{NH}_3$ ) electrode catalysts after the electrocatalytic tests. For structural characterization, we prepared the different amounts of N-doped C ( $\text{NH}_3$ ) (1mg and 5mg) electrodes for electrocatalytic experiments and then physically removed the catalyst of the electrodes for TEM and XPS characterization.

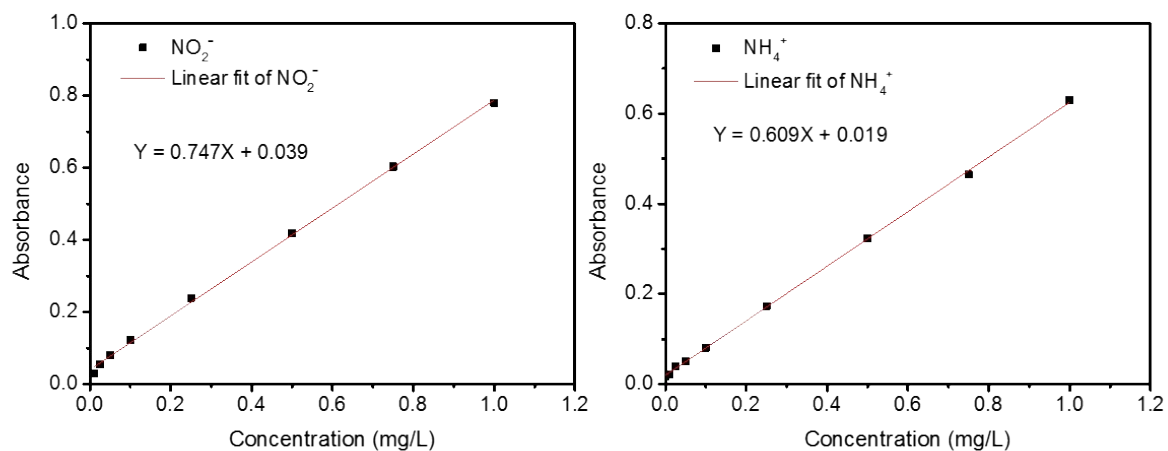

**Fig. S1** The calibration curves used to calibrate the concentrations of  $\text{NO}_2^-$  and  $\text{NH}_4^+$  ion by spectrophotometer at 520 nm and 655 nm absorbance spectra, respectively.

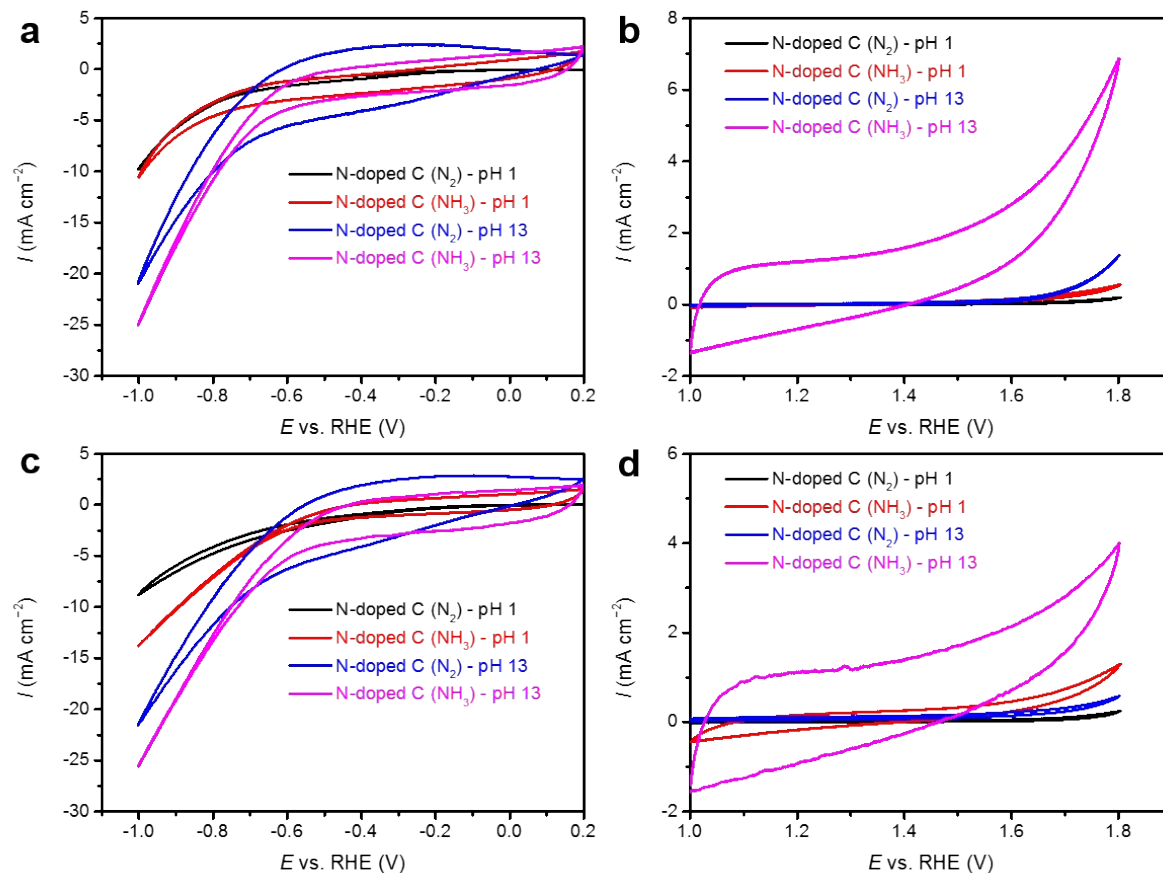

**Fig. S2** CV curves of N-doped C ( $\text{N}_2$ ) and N-doped C ( $\text{NH}_3$ ) on HER (a, c) and OER (b, d) in 0.05 M  $\text{H}_2\text{SO}_4$  (pH 1) electrolyte and 0.1 M NaOH (pH 13) electrolyte. A carbon paper (c, d) instead of a Pt wire as a counter electrode in order to ensure that there is no migration of Pt ions to the working electrode during the electrocatalytic experiments, HER and OER results show that the electrocatalytic activities of N-doped C ( $\text{NH}_3$ ) and N-doped C ( $\text{N}_2$ ) C are similar and without major change.

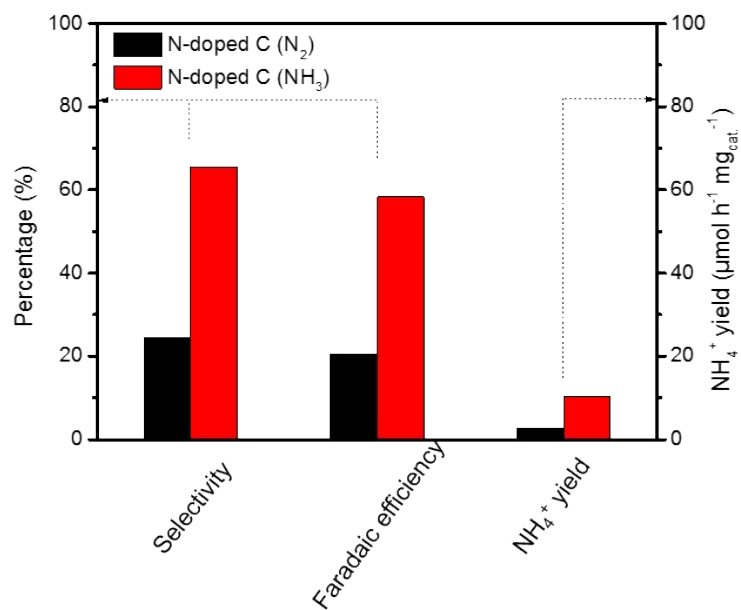

**Fig. S3** The selectivity, Faradaic efficiency and NH<sub>4</sub><sup>+</sup> yield of N-doped C (NH<sub>3</sub>) toward nitrite reduction to ammonia.

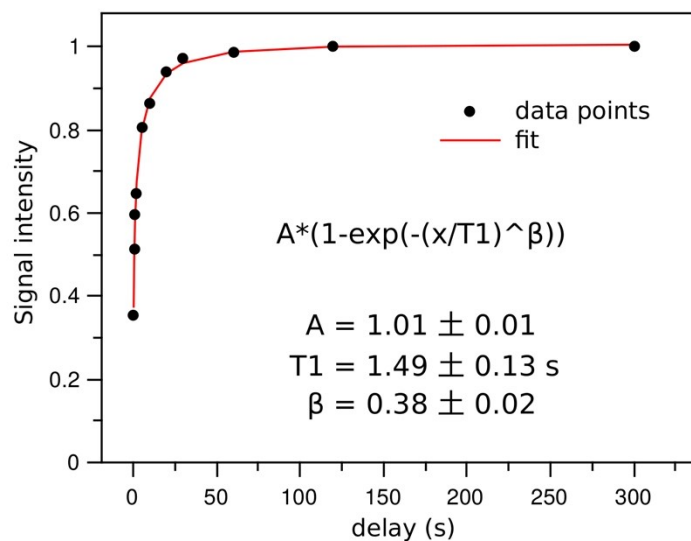

**Fig. S4** T<sub>1</sub> NMR relaxation curve for <sup>13</sup>C in N-doped C (NH<sub>3</sub>). The same dataset fitted with biexponential function [ $A1 \cdot (1 - \exp(-x/T1)) + A2 \cdot (1 - \exp(-x/T2))$ ] provided A1 and A2 of 0.55 and 0.45, and T1 and T2 of 0.21 and 7.01 s, respectively (simple exponential function does not fit).

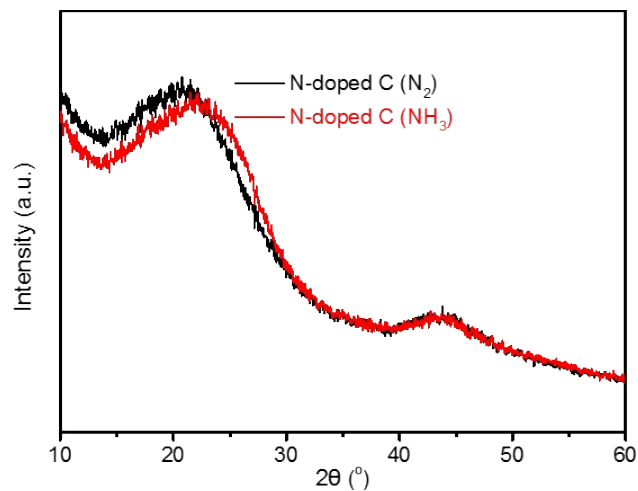

Fig. S5 XRD of N-doped C ( $N_2$ ) and N-doped C ( $NH_3$ ).

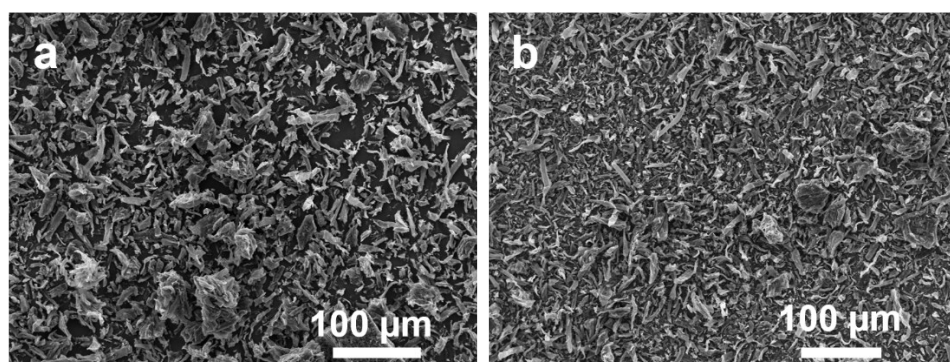

Fig. S6 SEM micrographs of N-doped C ( $NH_3$ ) (a) and N-doped C ( $N_2$ ) (b).

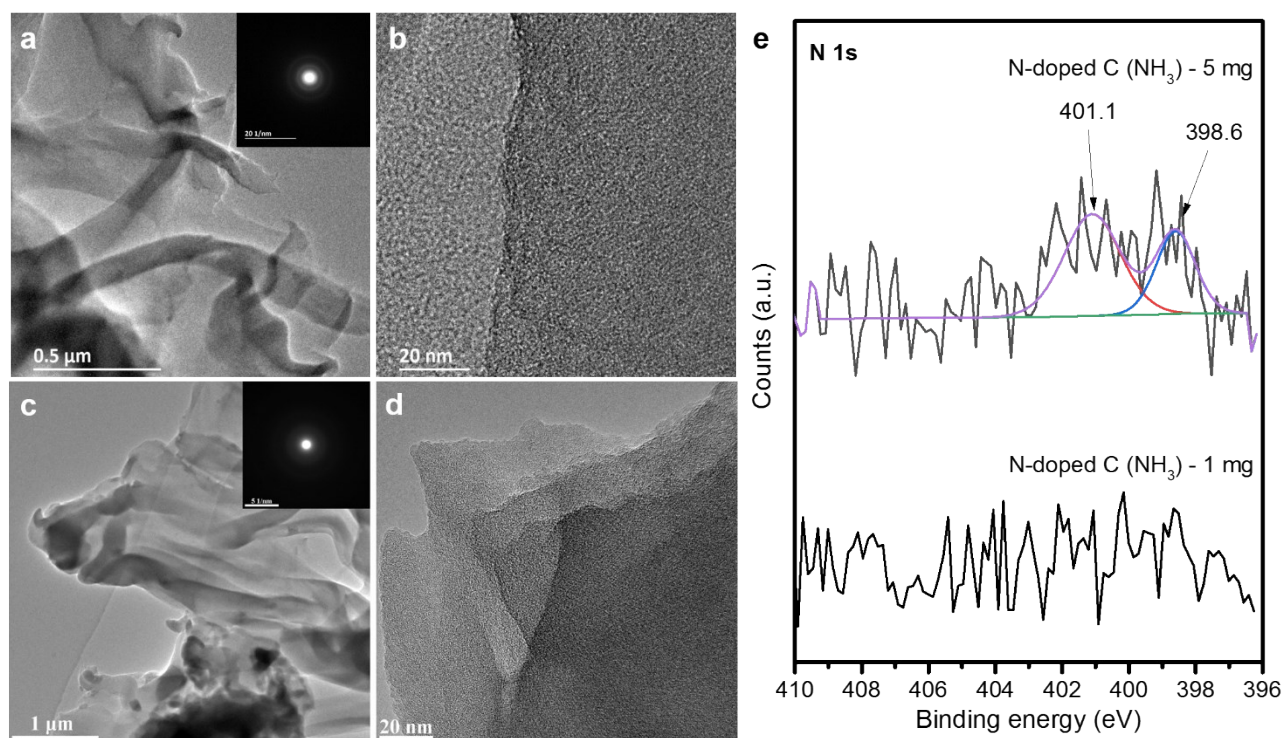

Fig. S7 TEM images of N-doped C ( $NH_3$ ) before (a, b) and after (c, d) the electrocatalytic tests; (e) XPS N 1s spectra of the N-doped C ( $NH_3$ ) electrode catalysts after the electrocatalytic tests. For structural characterization, we prepared the different amounts of N-doped C ( $NH_3$ ) (1mg and 5mg) electrodes for electrocatalytic experiments and then physically removed the catalyst of the electrodes for TEM characterization. For XPS analysis, the N-doped carbon component was not removed from the composite electrode and Figure e shows the XPS spectrum of the complete thin film electrode.
